# Supplementary material
Source: HighWire-hosted journal article supplement (https://sti.bmj.com/content/100/2/91)
Supplement: inline-supplementary-material-1 [file inline-supplementary-material-1.pdf]

## 1. Machine interface

BNSSG: first page, consent page and page if users do not meet criteria to use the service

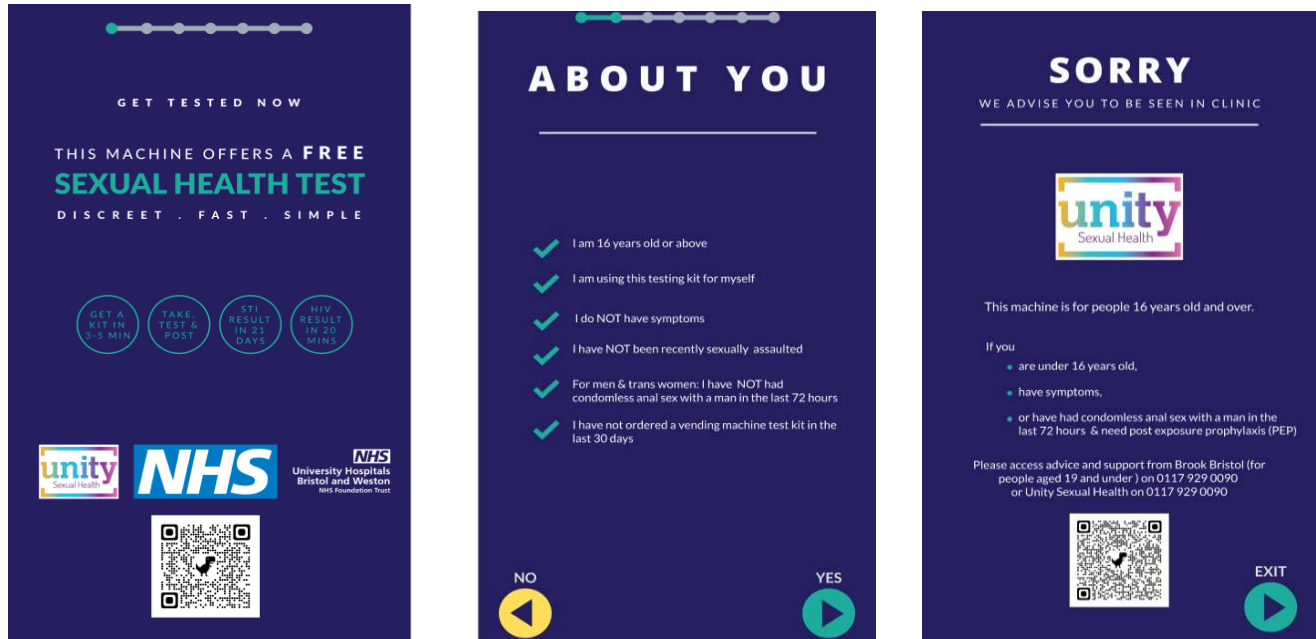

Brighton and Hove: first page, consent page and page if users do not meet criteria to use the service

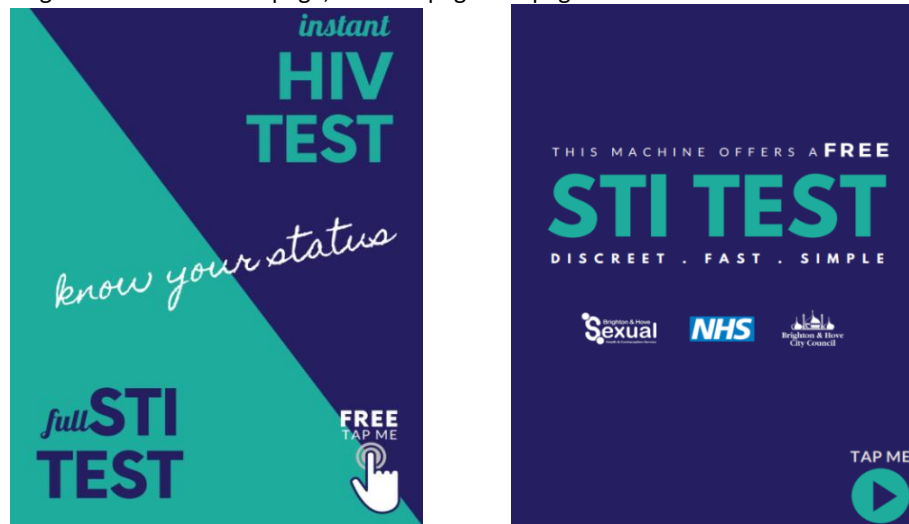

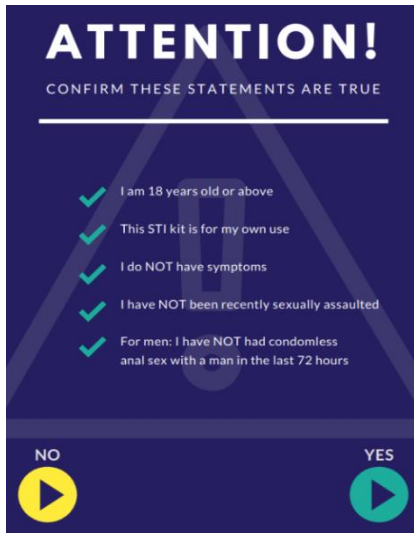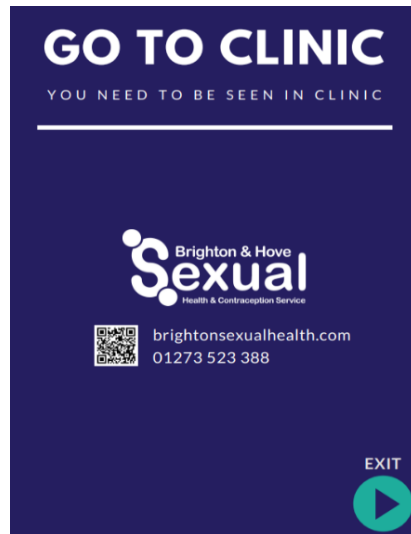

BNSSG and BH: 6 questions and choice page

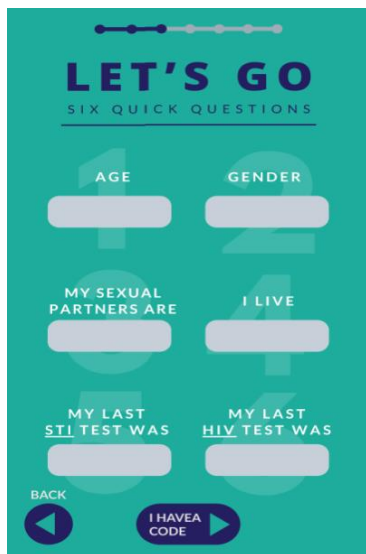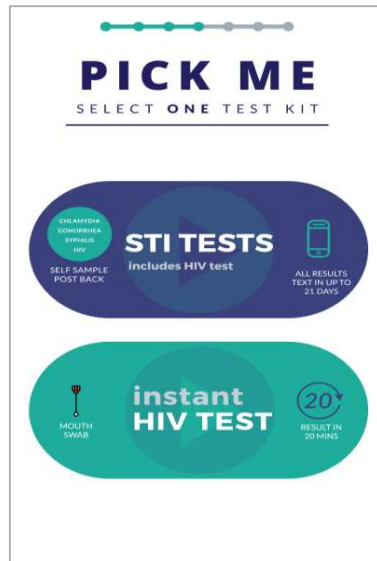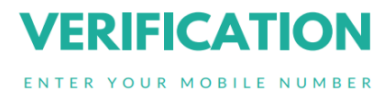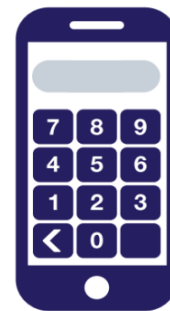

WE'LL TEXT YOU A CODE TO ENTER ON THE NEXT SCREEN  
**DON'T WORRY** WE DON'T STORE YOUR NUMBER

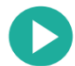

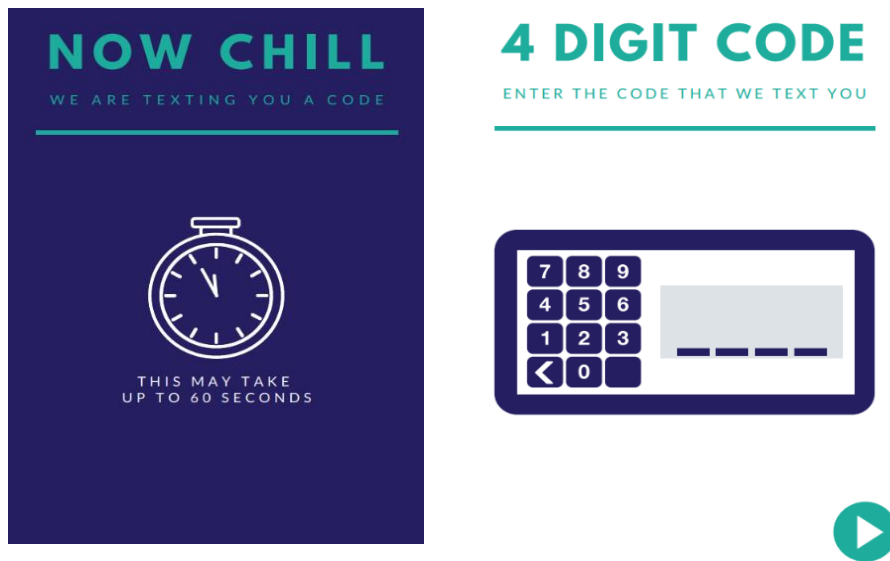

## 2. A. Process flow chart

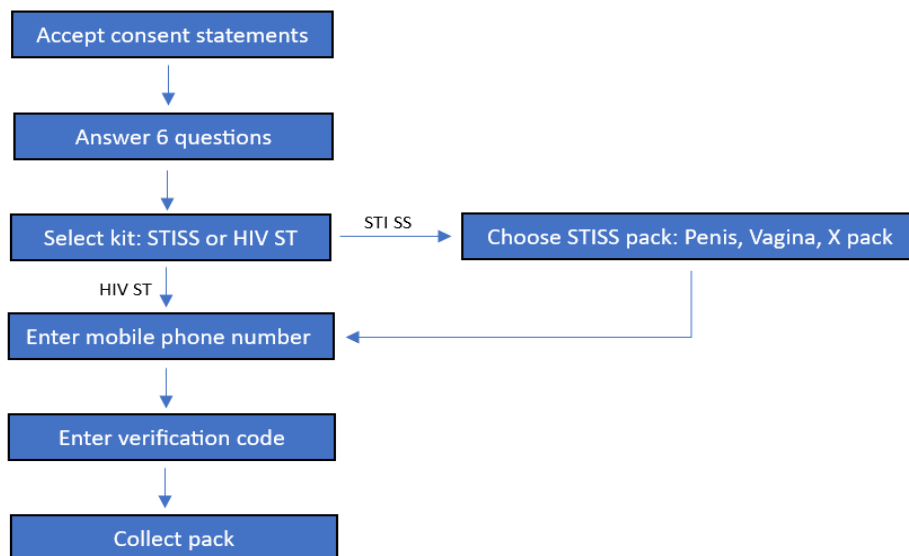

*A mobile phone number to be used only once over a period of 28 days, preventing the same user (identified by their mobile phone number) from obtaining several HIV self-test kits and potentially selling them for profit.*

## 2B. Stock management

The arrangements for monitoring and restocking the machines varied by site based on the agreement between the SH service and the venue. In BH the machines were monitored by venue staff who checked regularly (daily to weekly) and called the local SHS when running low for new stock to be dropped off.

In BNSSG, for three venues stock was held on site with venue staff responsible for checking stock levels within the machines and restocking as required, staff were then responsible for contacting the SHS when the stockpile was running low, and kit was either posted or hand delivered to the venue.

For one site in BNSSG, the SHS took responsibility for monitoring the stock levels within the machine remotely (via vendlive) and restocking the machine as required.

### 3. Questionnaire

**I have read the patient information sheet and consent to my data being used in the study.**

- Yes

**What is your age?**

- 18-25
- 26-35
- 36-45
- 46-55
- 55+ years

**What is your gender?**

- Male (including trans-male)
- Female (including trans-female)
- Non-binary
- Other [blank space]
- Prefer not to say

**What is your ethnicity?**

- White (includes: English, Welsh, Scottish, Northern Irish, Gypsy, Any other White background)
- Mixed or multiple ethnic groups (includes: White and Black Caribbean, White and Black African, White and Asian, Any other Mixed or Multiple ethnic background)
- Asian or Asian British (includes: Indian, Pakistani, Bangladeshi, Chinese, Any other Asian background)
- Black, African, Caribbean or Black British (includes: African, Caribbean, Any other Black, African or Caribbean background)
- Other ethnic group (includes: Arab, Any other ethnic group)

**Is English your first language? If no, please state your first language.**

- Yes
- No [blank space]

**I have sex with...**

- Men (including trans men)
- Women (including trans women)
- Men and women
- Prefer not to say

**Do any of the following apply to you?**

- Visual impairment
- Hearing impairment
- Long standing physical health condition
- Long standing mental health condition
- Learning disability
- Problematic drug/alcohol use
- None of the above

**Please describe your housing situation.**

- Securely housed
- Insecurely housed
- Street homeless
- Prefer not to say

**When was your last HIV test?**

- Less than 3 months
- 3-6 months
- 6-12 months
- 1-3 years
- More than 3 years
- Never

**When was your last STI test?**

- Less than 3 months
- 3-6 months
- 6-12 months
- 1-3 years
- More than 3 years
- Never

**Where did you hear about the vending machine? (you may choose more than one answer)**

- Word of mouth
- Advice from GP/healthcare professional
- Saw it in person
- Social media
- Other [blank space]

**What services have you used to check your sexual health before? (you may choose more than one answer)**

- Ordered online
- Sexual health clinic
- GP
- Pharmacy
- School/college/university
- Vending machine
- I've never tested
- Other [blank space]

**Why did you choose to get a kit from the vending machine?**

- Feels more confidential / private than a sexual health clinic
- I did not want a test kit coming through the post to my home
- I did not want to visit a sexual health clinic
- I don't have internet access
- I wanted instant access
- It was more convenient
- Other [Blank space]

**If the machine wasn't here, how would you test for HIV/STIs?**

- Sexual health clinic
- GP
- Postal service kit
- Pharmacy
- Other [blank space]
- I wouldn't have tested

**Which location did you use the vending machine in?**

- Multichoice for locations depending on BH or BNSSG

**What do think about the location of the vending machine?**

- It was in a convenient location
- It was easy to locate
- I could access the machine without any assistance
- I had no concerns about my safety when I used the machine
- I had no concerns about privacy when I used the machine

**How would you rate the user-friendliness of the vending machine?**

- Very good
- Good
- Average
- Poor
- Very poor

**Would you recommend this service to your friends?**

- Yes
- No

**Is there anything else you'd like to tell us about your experience of using the vending machine?**

[Blank space]

**\*BH only\***

**Please enter your email address to receive your £10 high street voucher.**

[enter email address]

**I am interested in receiving more information regarding the short interview on my views on the vending machines in exchange for a £20 high street voucher.**

- Yes
- No

**I would like to find out more about the results of this study and consent to being contacted with a copy of the results. I will enter my email address below to be contacted for this.**

- Yes
- No

## 4. Characteristics of people using the vending machine by venue type

|                            | General |        | University |        | Healthcare |        | Targetted |        | Occupational |        |
|----------------------------|---------|--------|------------|--------|------------|--------|-----------|--------|--------------|--------|
|                            | n=1834  | %      | n=337      | %      | n=150      | %      | n=113     | %      | n=102        | %      |
| <b>Age Group</b>           |         |        |            |        |            |        |           |        |              |        |
| < 18*                      | 61      | (3.3)  | 0          | (0)    | 4          | (2.7)  | 0         | (0)    | 0            | (0)    |
| 18 - 25                    | 761     | (41.5) | 290        | (86.1) | 58         | (38.7) | 24        | (21.2) | 30           | (29.4) |
| 26 - 35                    | 584     | (31.8) | 37         | (11.0) | 46         | (30.7) | 41        | (36.3) | 34           | (33.3) |
| 36 - 45                    | 264     | (14.4) | 9          | (2.7)  | 22         | (14.7) | 27        | (23.9) | 24           | (23.5) |
| 46 - 55                    | 111     | (6.1)  | 0          | (0)    | 9          | (6.0)  | 15        | (13.3) | 13           | (12.7) |
| 56+                        | 53      | (2.9)  | 1          | (0.3)  | 11         | (7.3)  | 6         | (5.3)  | 1            | (1.0)  |
| <b>Gender</b>              |         |        |            |        |            |        |           |        |              |        |
| Male (incl trans-male)     | 1035    | (56.4) | 150        | (44.5) | 83         | (55.3) | 85        | (75.2) | 56           | (54.9) |
| Female (incl trans-female) | 733     | (40.0) | 171        | (50.7) | 63         | (42.)  | 19        | (16.8) | 44           | (43.1) |
| Other <sup>5</sup>         | 66      | (3.6)  | 16         | (4.7)  | 4          | (2.7)  | 9         | (8.0)  | 2            | (2.0)  |
| <b>Sexual Partners</b>     |         |        |            |        |            |        |           |        |              |        |
| MSW                        | 621     | (33.9) | 119        | (35.3) | 51         | (34.0) | 20        | (17.7) | 29           | (28.4) |
| MSM/WM                     | 414     | (22.6) | 31         | (9.2)  | 32         | (21.3) | 65        | (57.5) | 27           | (26.5) |
| WSM/WM                     | 703     | (38.3) | 155        | (50.0) | 58         | (38.7) | 16        | (14.2) | 40           | (39.2) |
| WSW                        | 30      | (1.6)  | 16         | (4.7)  | 30         | (20.0) | 3         | (2.7)  | 4            | (3.9)  |
| Other <sup>#</sup>         | 66      | (3.6)  | 16         | (4.7)  | 4          | (2.7)  | 9         | (8.0)  | 2            | (2.0)  |
| <b>Previous HIV</b>        |         |        |            |        |            |        |           |        |              |        |
| ≤ 3 months                 | 202     | (11.0) | 34         | (10.1) | 25         | (16.7) | 30        | (26.5) | 20           | (19.6) |
| 3 -12 months               | 381     | (20.8) | 43         | (12.8) | 22         | (14.7) | 36        | (31.9) | 14           | (13.7) |
| > 12 months ago            | 536     | (29.2) | 56         | (16.6) | 31         | (20.7) | 26        | (23.0) | 40           | (39.2) |
| Never                      | 715     | (39.0) | 204        | (60.5) | 72         | (48.0) | 21        | (18.6) | 28           | (27.5) |
| <b>Previous STI</b>        |         |        |            |        |            |        |           |        |              |        |
| ≤ 3 months                 | 267     | (14.6) | 53         | (15.7) | 29         | (19.3) | 32        | (28.3) | 17           | (16.7) |
| 3 -12 months               | 497     | (27.1) | 57         | (16.9) | 23         | (15.3) | 38        | (33.6) | 27           | (26.5) |
| > 12 months ago            | 621     | (33.9) | 70         | (20.8) | 53         | (35.3) | 23        | (20.4) | 47           | (46.1) |
| Never                      | 449     | (24.5) | 157        | (46.6) | 45         | (30.0) | 20        | (17.7) | 11           | (10.8) |
| <b>Residence</b>           |         |        |            |        |            |        |           |        |              |        |
| In area                    | 1700    | (92.7) | 310        | (92.0) | 135        | (90.0) | 79        | (69.9) | 77           | (75.5) |
| Out of area                | 134     | (7.3)  | 27         | (8.0)  | 15         | (10.0) | 34        | (30.1) | 25           | (24.5) |
| <b>Test Kit</b>            |         |        |            |        |            |        |           |        |              |        |
| HIV Self Test              | 453     | (24.7) | 84         | (24.9) | 43         | (28.7) | 51        | (45.1) | 22           | (21.6) |



|                            |      |        |     |        |     |        |    |        |    |        |
|----------------------------|------|--------|-----|--------|-----|--------|----|--------|----|--------|
| STI Self Sample            | 1409 | (76.8) | 253 | (75.1) | 107 | (71.3) | 62 | (54.9) | 80 | (78.4) |
| <b>Time of Interaction</b> |      |        |     |        |     |        |    |        |    |        |
| Weekday 9am - 5pm          | 1028 | (56.1) | 144 | (42.7) | 133 | (88.7) | 33 | (29.2) | 78 | (76.5) |
| Weekday All other times    | 458  | (25.0) | 144 | (42.7) | 15  | (10.0) | 33 | (29.2) | 24 | (23.5) |
| Weekend                    | 348  | (19.0) | 49  | (14.5) | 2   | (1.3)  | 47 | (41.6) | 0  | (0)    |

\* only collected in SW venues

§other - 87 non-binary, 10 other

# other - 51 non-binary bisexual, 36 non-binary other sexual partner, 2 other gender bisexual, 8 other gender other sexual partner

## 5. Additional survey responses

|                                             | Survey results |        |
|---------------------------------------------|----------------|--------|
|                                             | n=208          | %      |
| <b>First Language</b>                       |                |        |
| English                                     | 180            | (86.5) |
| Not English                                 | 28             | (13.5) |
| <b>Health status*</b>                       |                |        |
| Visual impairment                           | 11             | (5.3)  |
| Hearing impairment                          | 4              | (1.9)  |
| Long standing physical health condition     | 15             | (7.2)  |
| Long standing mental health condition       | 30             | (14.4) |
| Learning disability                         | 18             | (8.7)  |
| <b>Housing status</b>                       |                |        |
| Securely housed                             | 190            | (91.3) |
| Insecurely housed                           | 15             | (7.2)  |
| Street homeless                             | 0              | (0)    |
| Prefer not to say                           | 3              | (1.4)  |
| <b>Previous testing locations*</b>          |                |        |
| Ordered online                              | 81             | (38.9) |
| Sexual health clinic                        | 132            | (63.5) |
| GP                                          | 47             | (22.6) |
| Pharmacy                                    | 10             | (4.8)  |
| School/college/university                   | 19             | (9.1)  |
| Vending machine                             | 21             | (10.1) |
| Never tested                                | 36             | (17.3) |
| Other                                       | 2              | (1.0)  |
| <b>How did you hear about the machine?*</b> |                |        |
| Word of mouth                               | 31             | (14.9) |
| Advice from GP or HCP                       | 17             | (8.2)  |
| Saw it in person                            | 87             | (41.8) |
| Social media                                | 32             | (15.4) |
| Other                                       | 48             | (23.1) |

\* multichoice answer so may not equal 100%

Not English first language. Spanish = 7, Italian = 4, French/German = 3, Arabic, Bulgarian, Cantonese, Greek, Hungarian, Romanian, Swedish, Welsh = 1

HCP – Health care professional
